# Supplementary material for: Cancer PRSweb – an Online Repository with Polygenic Risk Scores (PRS) for Major Cancer Traits and Their Phenome-wide Exploration in Two Independent Biobanks
Source: bioRxiv or medRxiv preprint supplement (doi:10.1101/2020.01.22.915751), 2020-01-24
Supplement: Supplementary file [file media-1.pdf]

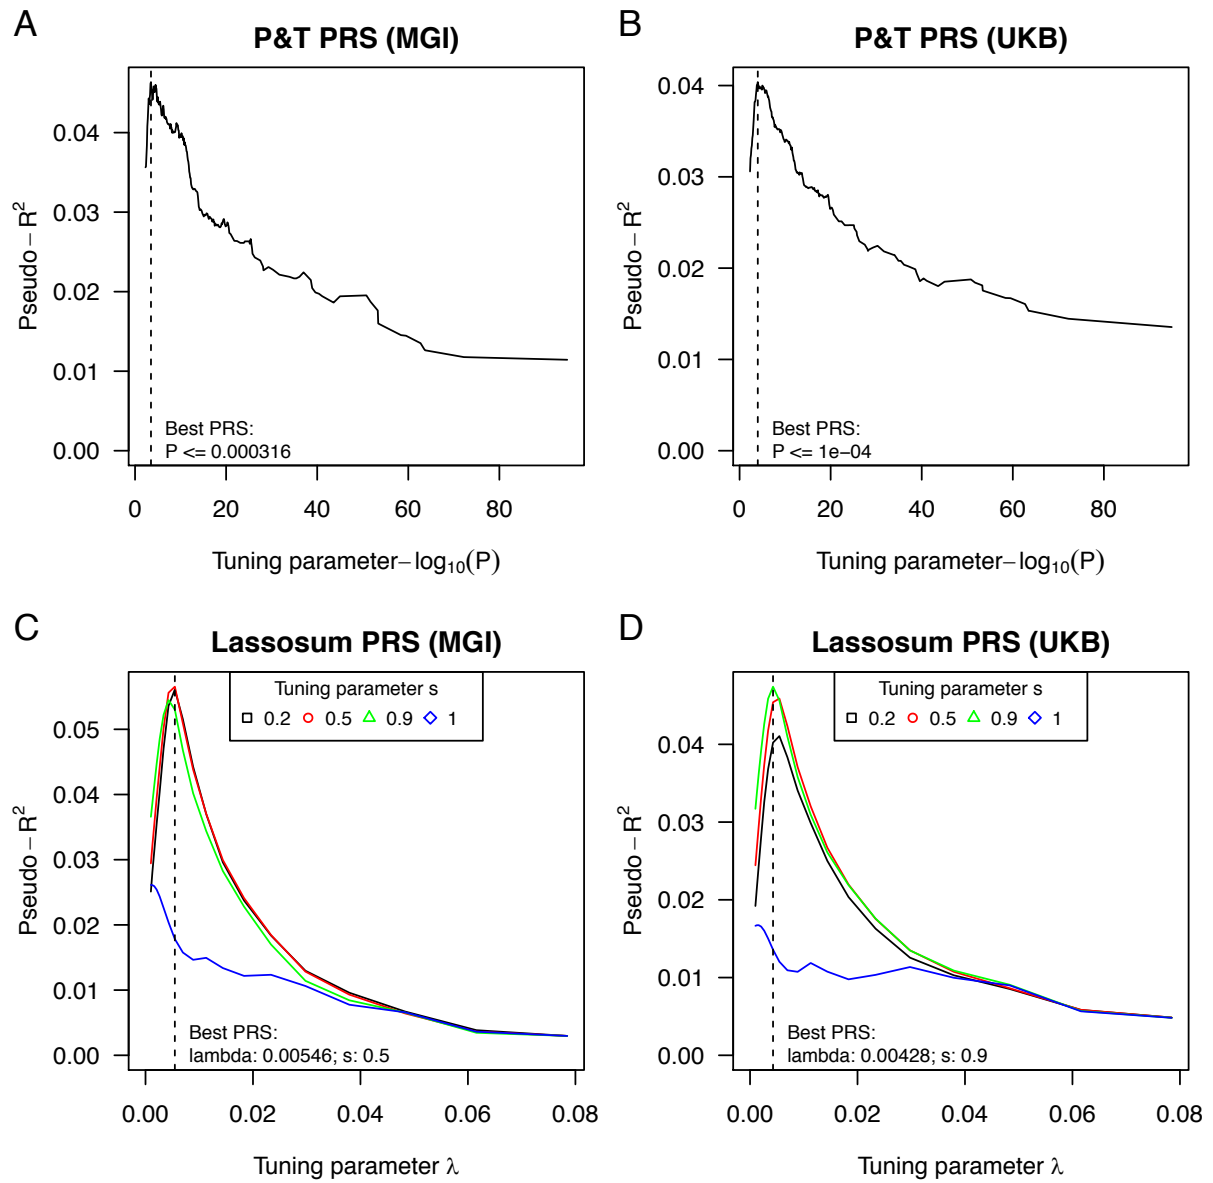

**Figure S1: Tuning Parameter Optimization:** Tuning parameter optimization for the large GWAS based breast cancer PRS with Lassosum (A and B) and “P&T” approach (C & D) for MGI (A & C) and UKB (B & D).

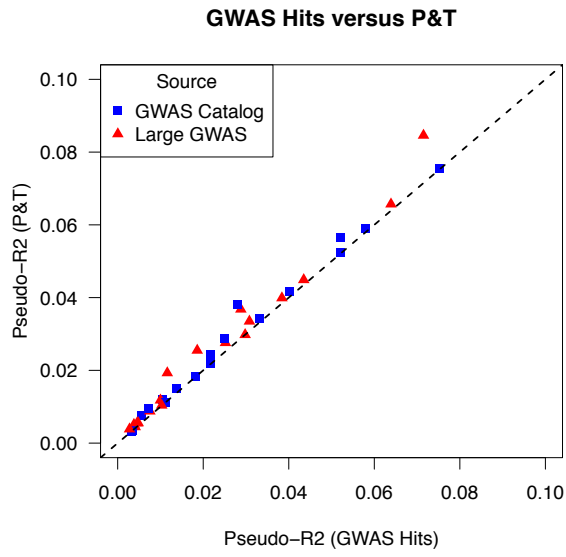

**Figure S2: P&T versus GWAS Catalog hits.** Pairwise comparison of the two PRS methods P&T and “GWAS hits” ( $P \leq 5 \times 10^{-8}$ ) using GWAS Catalog entries as input. 36 PRS for 20 cancer traits (18 MGI PRS and 18 UKB PRS) are shown. Dashed line: identity line.

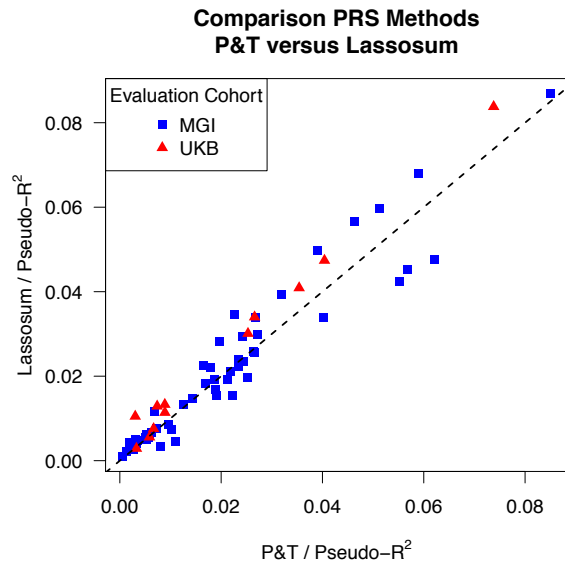

**Figure S3: “P&T versus Lassosum”.** Pairwise comparison of the two PRS methods P&T and Lassosum using pseudo-R<sup>2</sup>. 70 GWAS sources where P&T and Lassosum-based PRS were positively and nominally significant associated with their cancer trait in MGI (blue; 58 PRS) and UKB (red; 12 PRS) are shown. Dashed line: identity line.

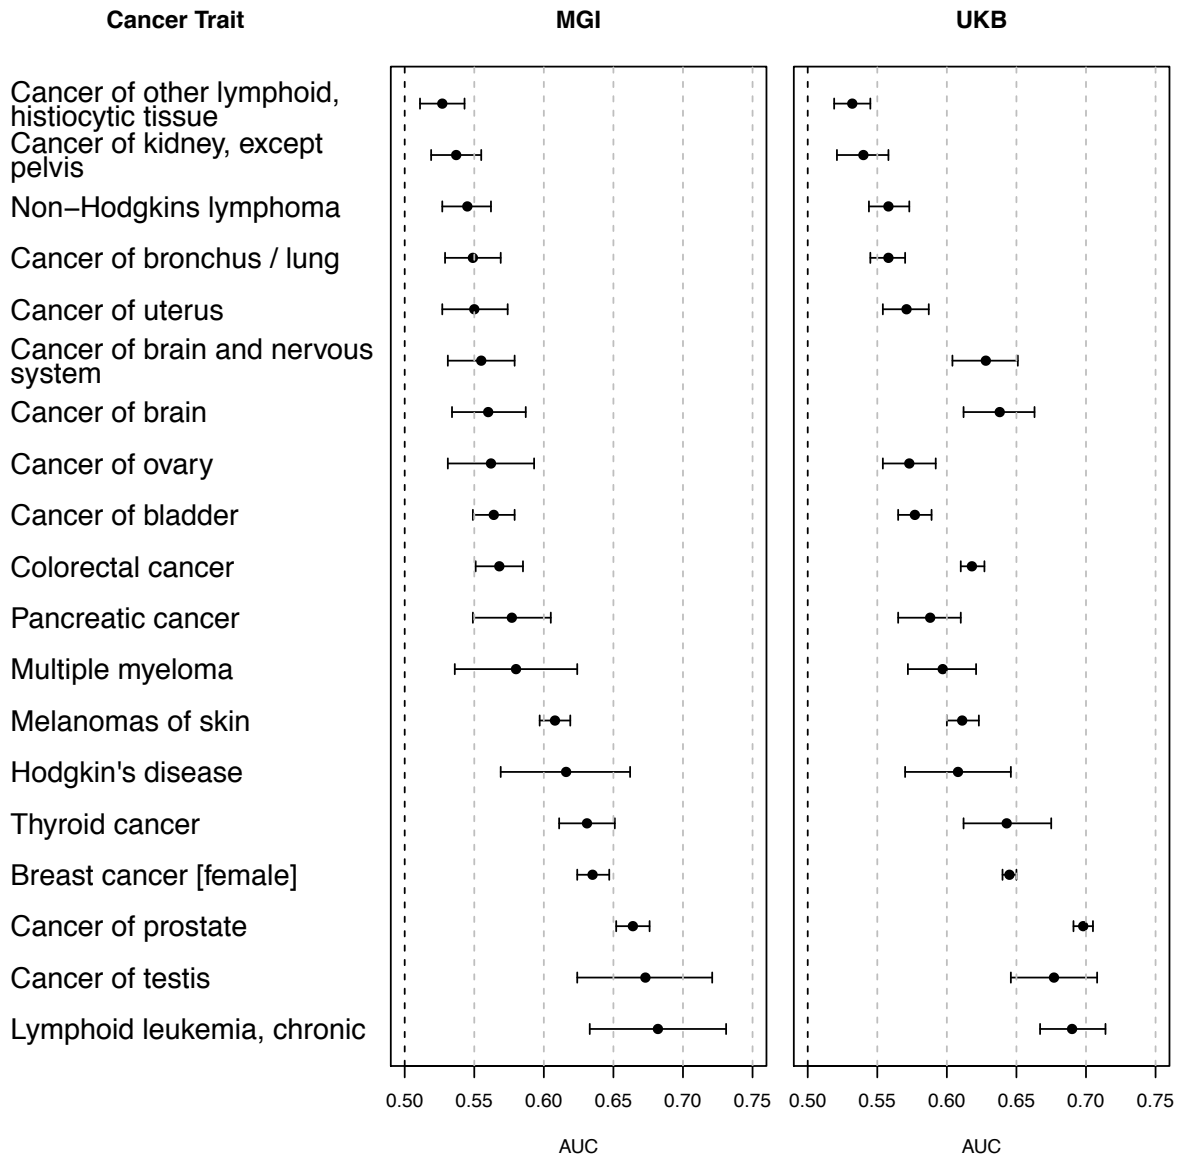

**Figure S4:** AUC of the top ranked PRS for 19 cancers that were present for MGI (left) and UKB (right). AUC values (dots) and their 95% confidence intervals are shown.

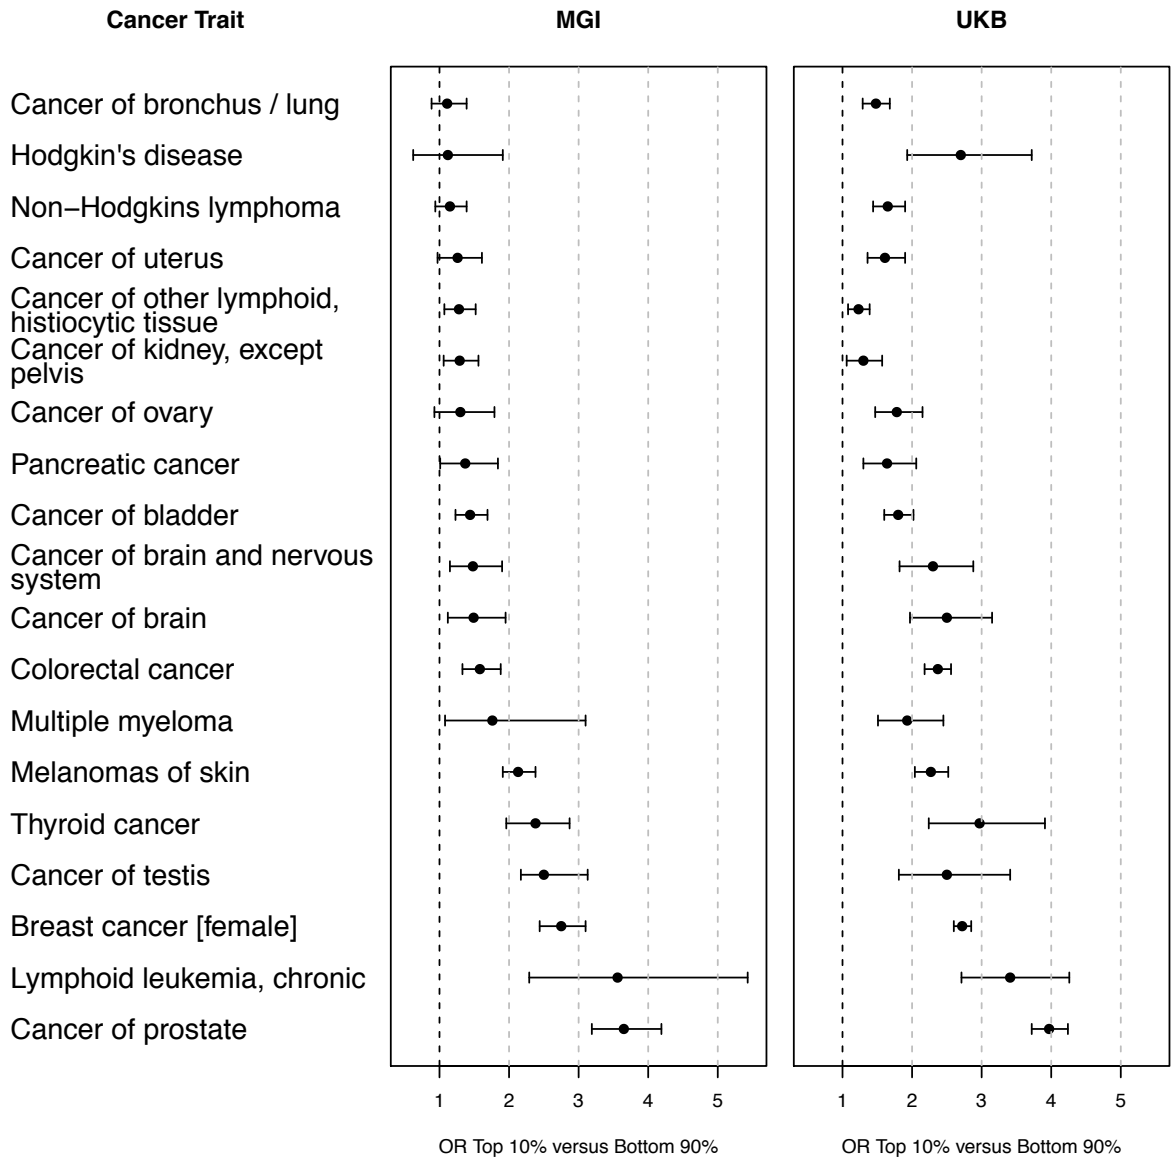

**Figure S5:** Case enrichment of the top ranked PRS for 19 cancers that were present for MGI (left) and UKB (right). Odds ratios (OR, top 10% versus bottom 90% of PRS distribution) and their 95% confidence intervals are shown.

### Risk Allele Frequency (RAF) Comparison GWAS Catalog versus MGI

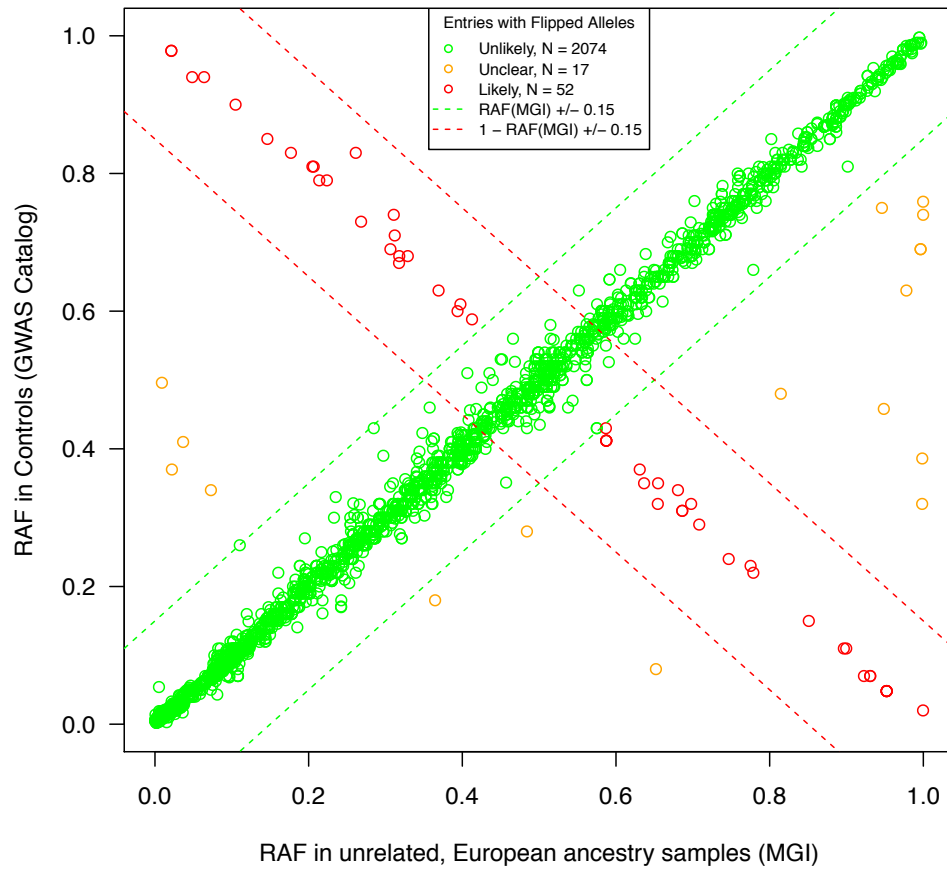

**Figure S6** Comparison of the Risk Allele Frequencies in the GWAS Catalog vs. MGI

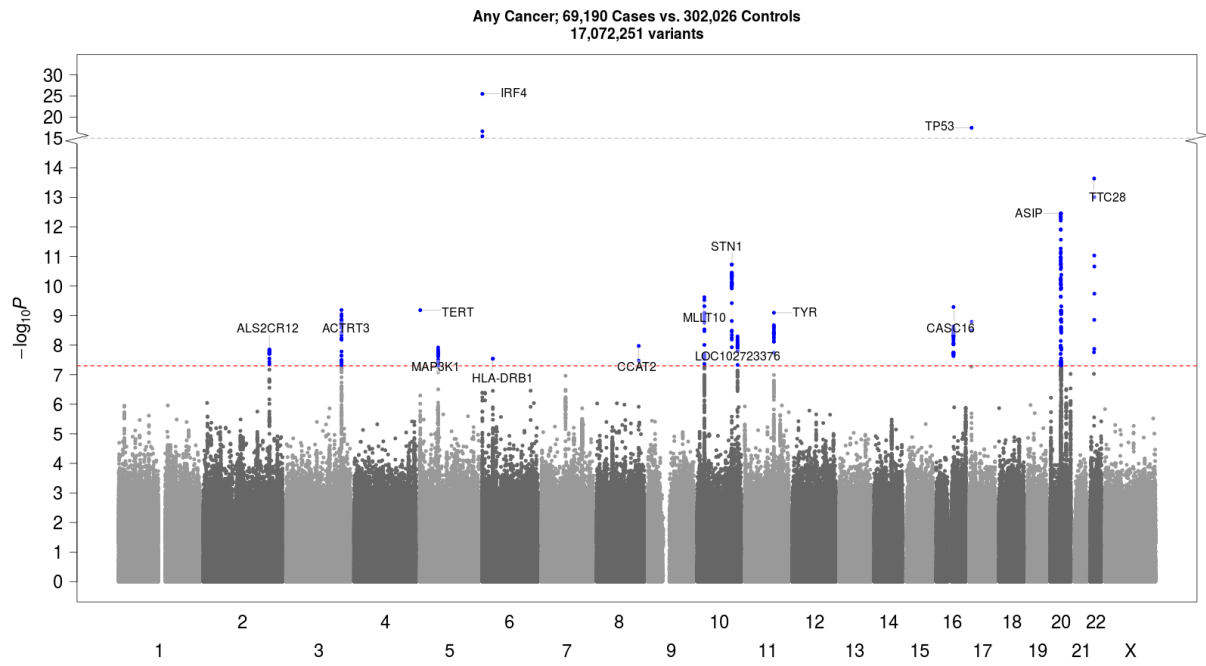

**Figure S7:** Manhattan plot of UKB GWAS on 69,190 cases with any cancer versus 302,026 controls. SNPs with  $P < 5 \times 10^{-8}$  are highlighted in blue. Candidate loci are named after the nearest gene closest to the strongest signal.

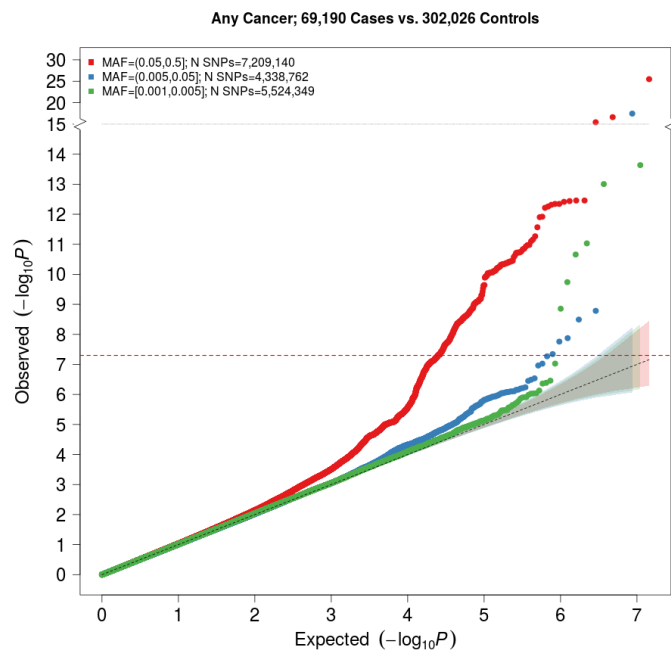

**Figure S8:** QQ plot of UKB GWAS on 69,190 cases with any cancer versus 302,026 controls. -  $\log_{10}(P\text{-values})$  are stratified by minor allele frequency (MAF) bins.



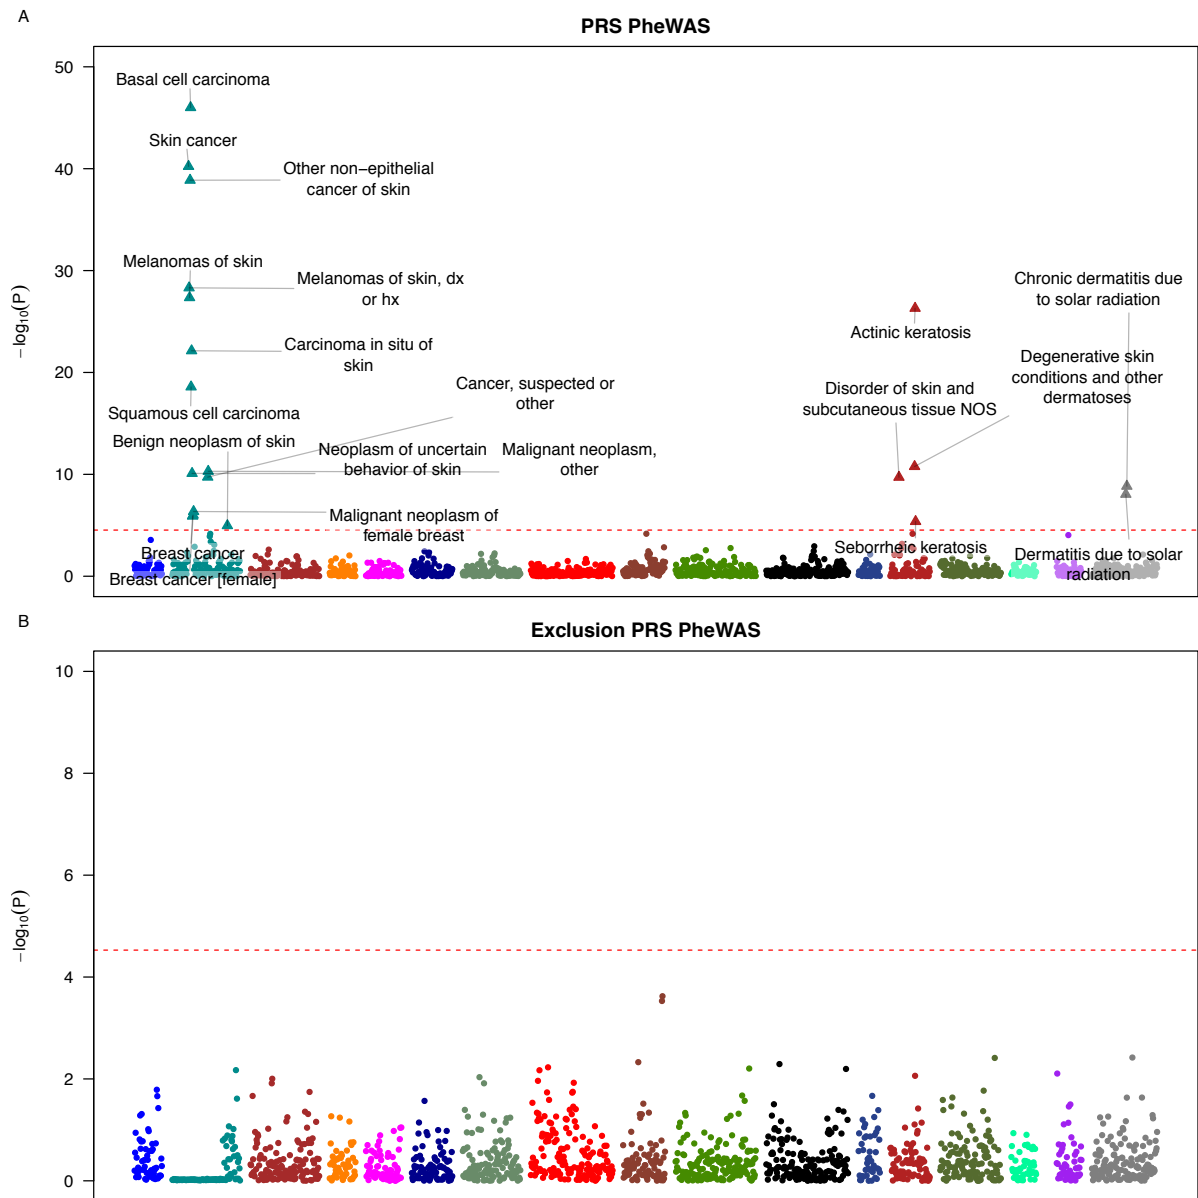

**Figure S9:** PRS PheWAS plot of the ‘any cancer’ lassosum PRS in MGI before (top) and after (bottom) excluding 20,751 MGI individuals with ‘any cancer’.
